# Supplementary material for: Deformable and highly adhesive poly(ionic liquid)/liquid metal visco-elastomers for thermal management
Source: Royal Society of Chemistry journal article supplement (doi:10.1039/d4ta03473b), 2024-01-01
Supplement: d4ta03473b1.pdf [file d4ta03473b1.pdf]

Electronic Supplementary Material (ESI) for Journal of Materials Chemistry A.  
This journal is © The Royal Society of Chemistry 2024

## Supplementary Information

### **Deformable and Highly Adhesive Poly(ionic liquid)/Liquid Metal Visco-Elastomers for Thermal Management**

Baohao Yang,<sup>ab</sup> Jianhui Zeng,<sup>ac</sup> Ting Liang,<sup>d</sup> Meng Han,<sup>\*a</sup> Chenxu Zhang,<sup>a</sup> Jian-Bin Xu,<sup>d</sup> Yimin Yao,<sup>\*a</sup> and Rong Sun<sup>a</sup>

- a. State Key Laboratory of Materials for Integrated Circuits, Shenzhen Institute of Advanced Electronic Materials, Shenzhen Institute of Advanced Technology, Chinese Academy of Sciences, Shenzhen 518055, China.
- b. Nano Science and Technology Institute, University of Science and Technology of China, Suzhou 215000, China
- c. Guangdong Key Laboratory for Processing and Forming of Advanced Metallic Materials, School of Mechanical & Automotive Engineering, South China University of Technology, 381 Wushan, Guangzhou 510640, China.
- d. Department of Electronics Engineering, The Chinese University of Hong Kong, Hong Kong 999077, China.

\*Corresponding author: meng.han@siat.ac.cn, ym.yao@siat.ac.cn

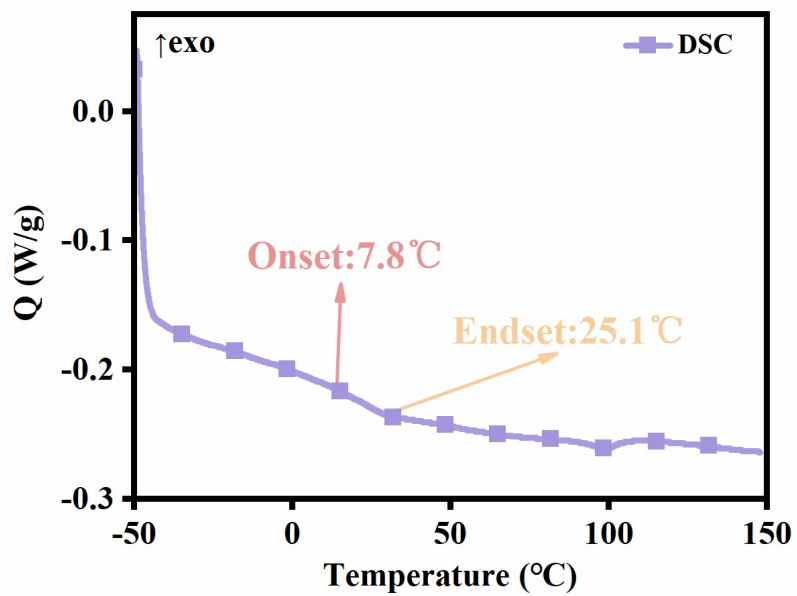

**Fig. S1** DSC curve of P[OVIm]NTf<sub>2</sub> bulk material in the temperature range of -50 to 150 °C.

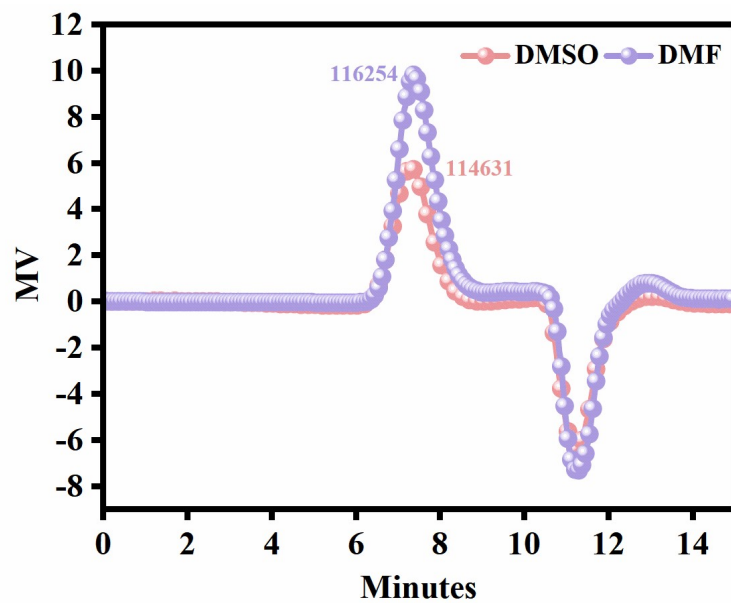

Fig. S2 GPC curves of P[OVIm]NTf<sub>2</sub> in two solvents, DMF and DMSO.

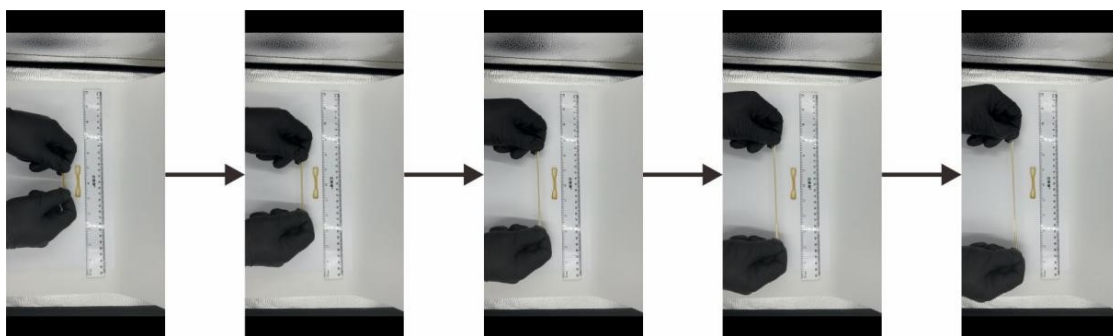

**Fig. S3** Demonstration of the stretching process of P[OVIm]NTf<sub>2</sub> visco-elastomers.

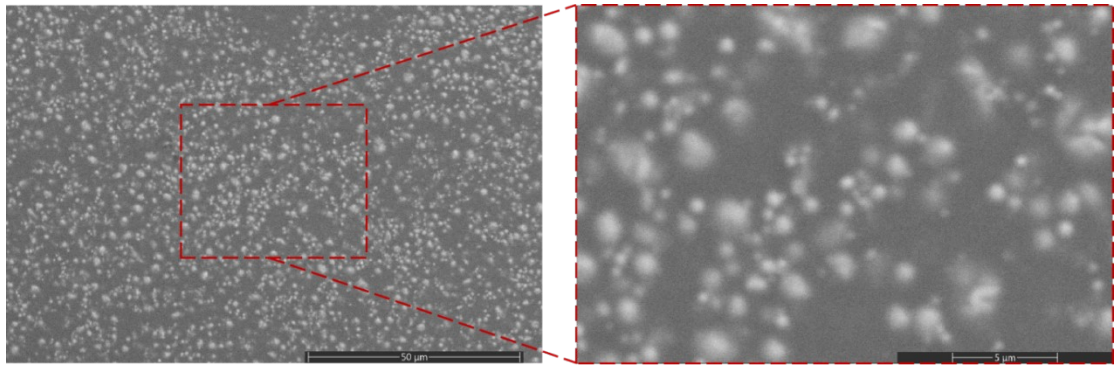

**Fig. S4** SEM image of P[OVIm]NTf<sub>2</sub>/LM (39 vol%) visco-elastomers.

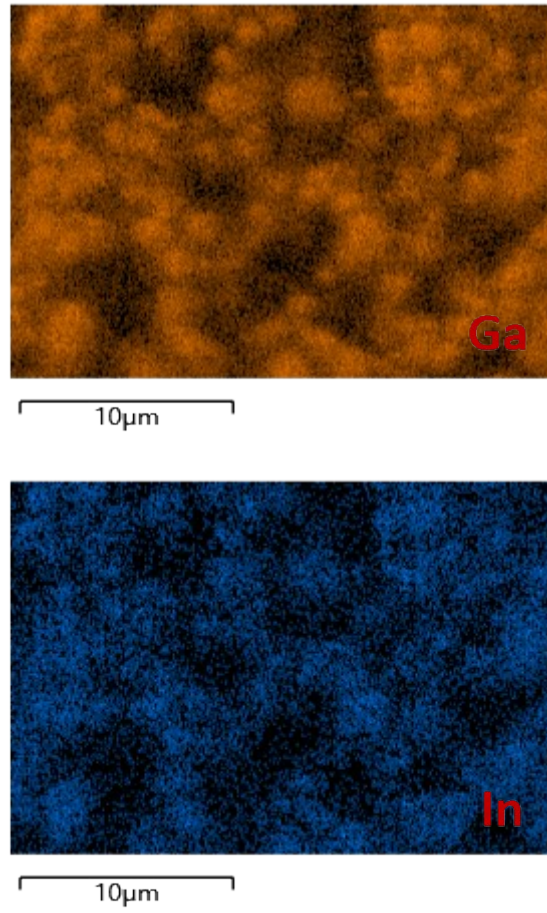

**Fig. S5** Elemental distribution mapping of P[OVIm]NTf<sub>2</sub>/LM (39 vol%) visco-elastomers.

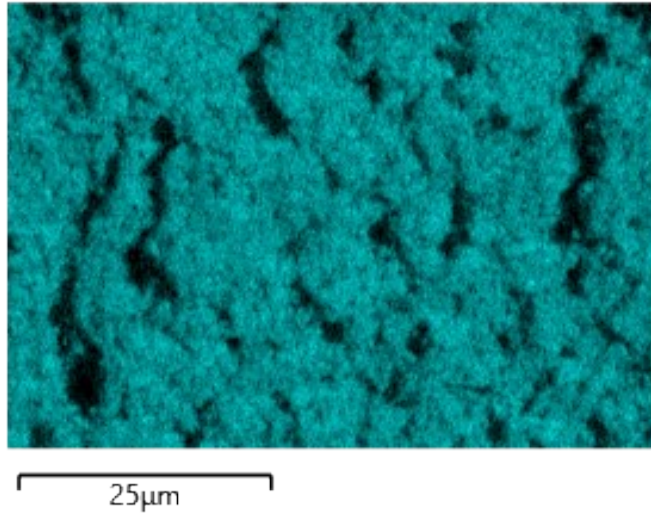

**Fig. S6** Elemental distribution mapping of P[OVIm]NTf<sub>2</sub>/LM (66 vol%) visco-elastomers.

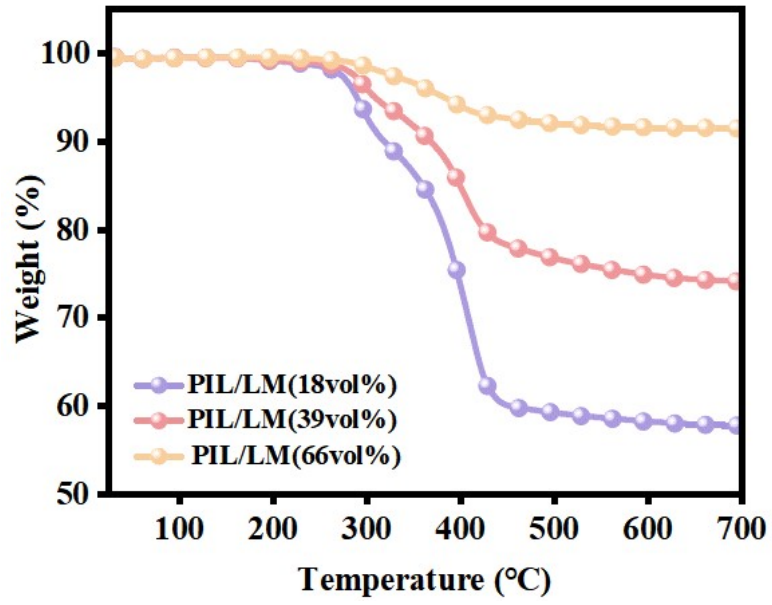

**Fig. S7** A comparison of thermal decomposition curves for three proportions under a nitrogen atmosphere, within a temperature range of 20-700 °C.



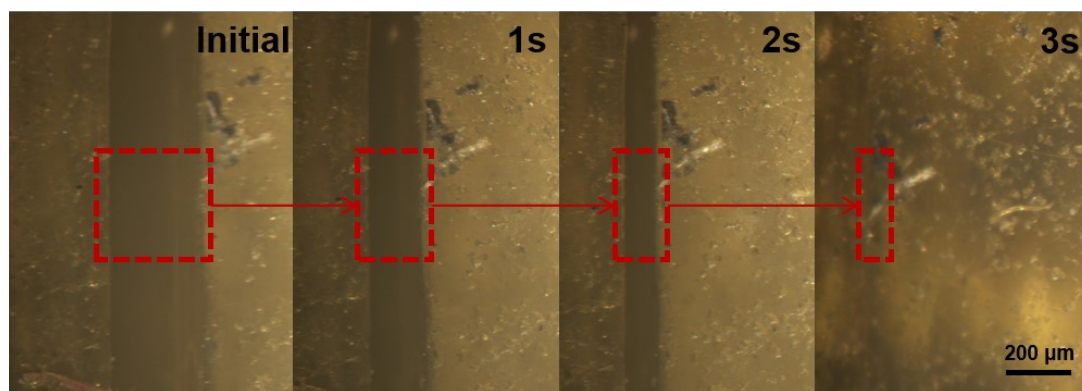

**Fig. S8** Optical microscopy images of the P[OVIm]NTf<sub>2</sub> self-healing process.

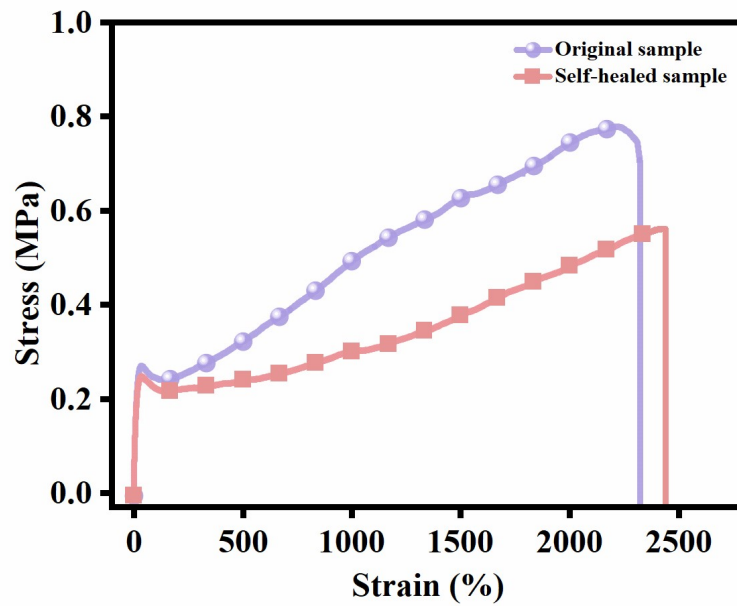

Fig. S9 The mechanical tensile properties of P[OVIm]NTf<sub>2</sub> before and after self-healing.

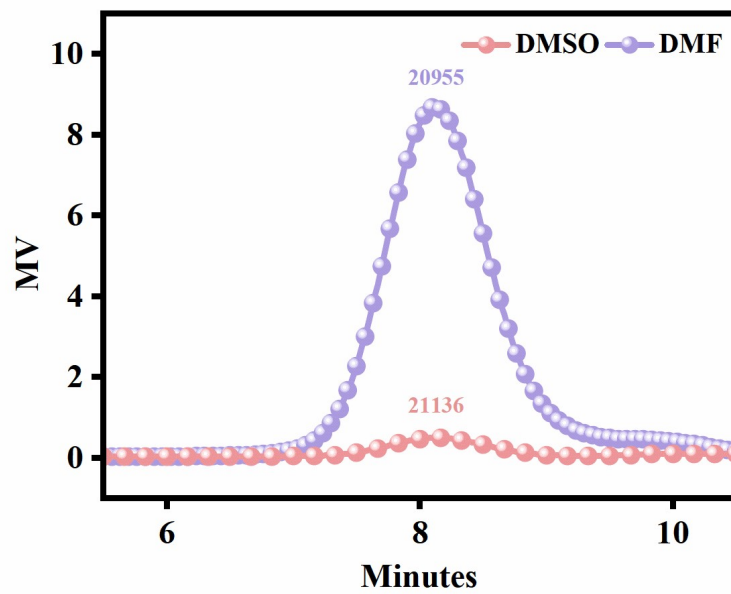

**Fig. S10** GPC curves of low MW P[OVIm]NTf<sub>2</sub> in two solvents, DMF and DMSO.

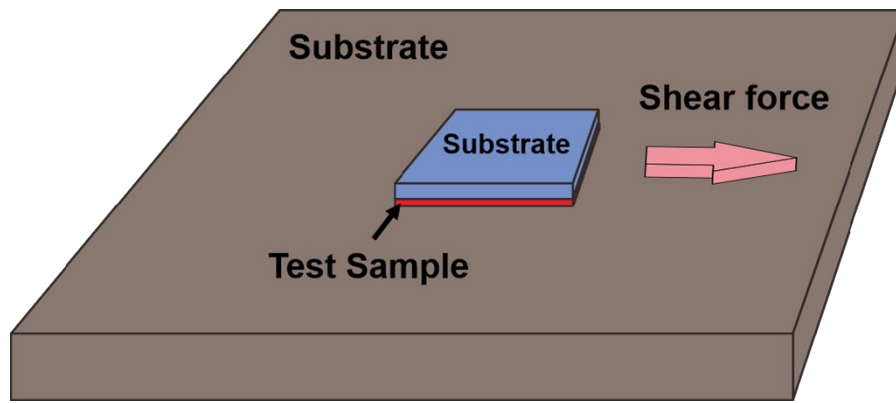

**Fig. S11** Diagram of Test Method for Interface Adhesion Performance.

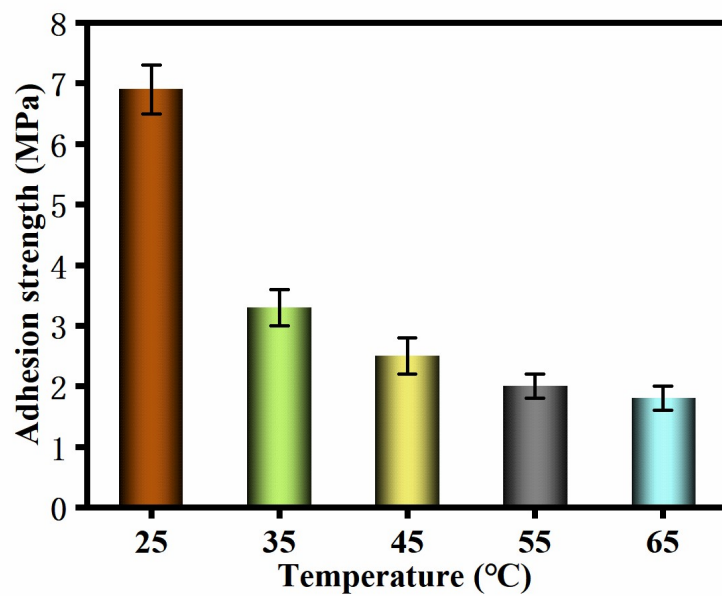

**Fig. S12** Interface adhesion strength test at different temperatures for P[OVIm]NTf<sub>2</sub>.
